# Supplementary figures and images for: Microsporidia Are Natural Intracellular Parasites of the Nematode Caenorhabditis elegans
Source: PLOS journal article supplement (doi:10.1371/journal.pbio.0060309), 2008-12-05

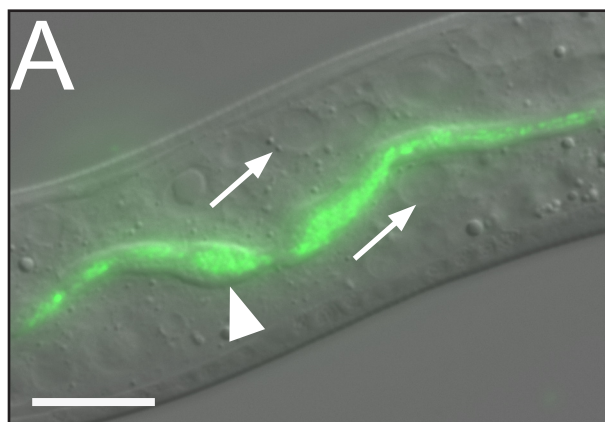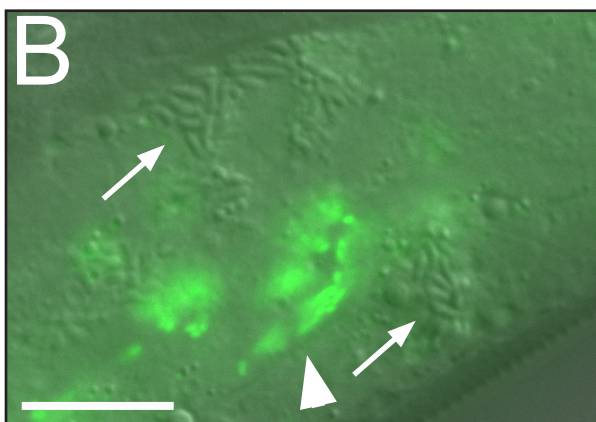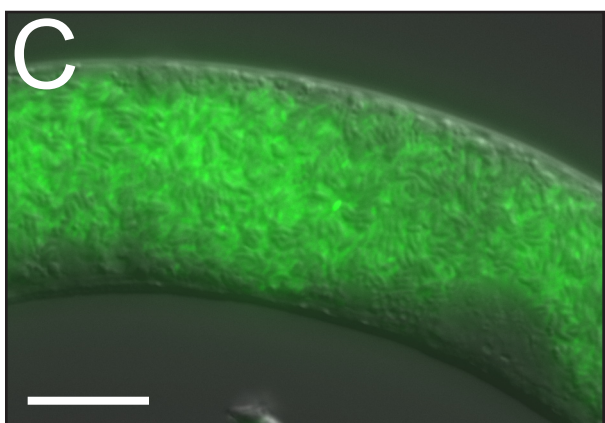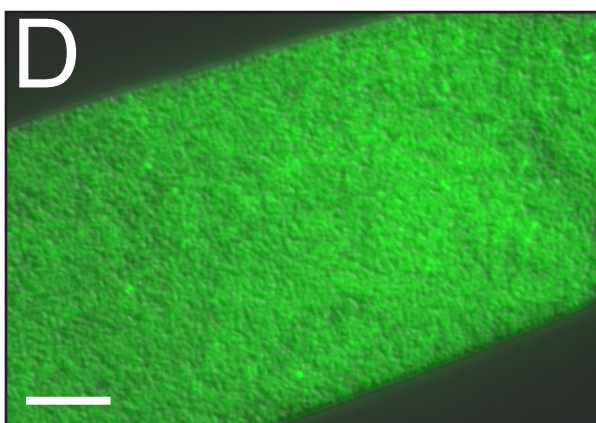

Supplement: S1 (10.1371/journal.pbio.0060309.s001) [file journal.pbio.0060309.s001]
